# Supplementary material for: Europium modified TiO2 as a high-rate long-cycle life anode material for lithium-ion batteries
Source: Royal Society of Chemistry journal article supplement (doi:10.1039/d1nj05560g), 2021-12-21
Supplement: d1nj05560g1.pdf [file d1nj05560g1.pdf]

## Supporting Information

### **Europium modified TiO<sub>2</sub> as a high-rate long-cycle life anode material for lithium-ion batteries**

Jian Li,<sup>a,b</sup> Yanjun Cai,<sup>a,b,\*</sup> Xiang Yao,<sup>a,b</sup> Hualing Tian,<sup>a,b</sup> Zhi Su,<sup>a,b,c,\*</sup>

<sup>a</sup> College of Chemistry and Chemical Engineering, Xinjiang Normal University, Urumqi, 830054, Xinjiang, China

<sup>b</sup> Xinjiang Key Laboratory of Energy Storage and Photoelectrocatalytic Materials, Urumqi, 830054, Xinjiang,

China

<sup>c</sup> Xinjiang Institute of Technology, China

\* Corresponding author. College of Chemistry and Chemical Engineering, Xinjiang Normal University, Urumqi,

830054, Xinjiang, China.

E-mail address: cyjxjsf@yeah.net, suzhixj@sina.com (Z. Su).

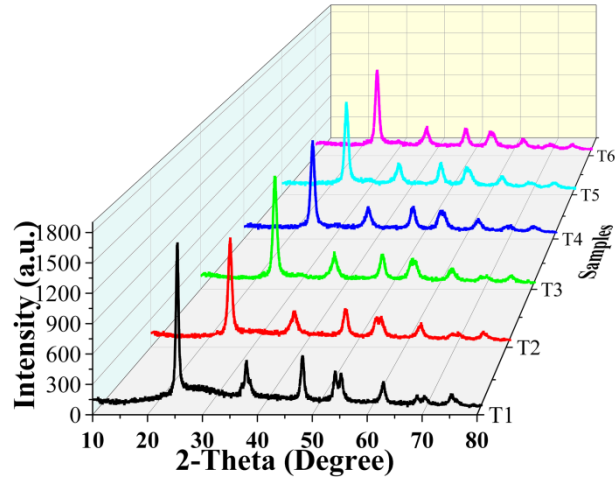

FigS1. XRD patterns of the as-prepared T1 to T6 with different europium doping contents.

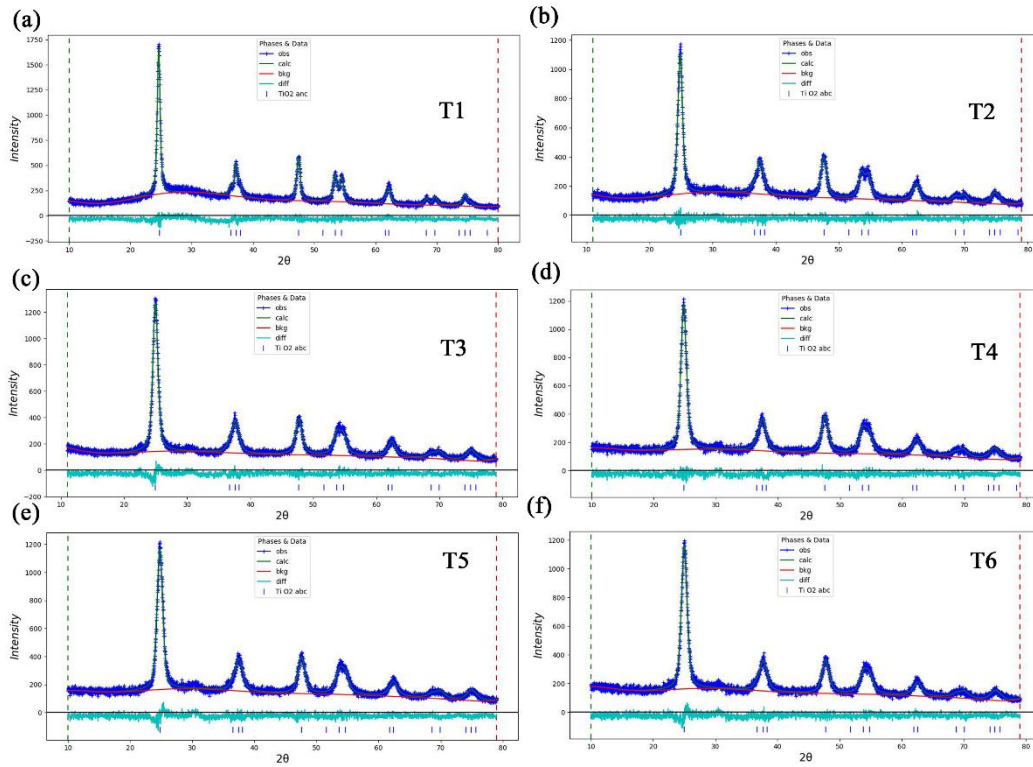

FigS2. (a-f) Rietveld refined fits using XRD data of  $Ti_{1-x}Eu_xO_2$  ( $x=0, 0.02, 0.04, 0.06, 0.08, \text{ and } 0.01$ ).

T1:  $R_{wp} = 8.60\%$  and  $GOF = 1.23$ , T2:  $R_{wp} = 8.18\%$  and  $GOF = 1.04$ , T3:  $R_{wp} = 8.11\%$  and  $GOF = 1.06$ ,

T4:  $R_{wp} = 8.04\%$  and  $GOF = 1.07$ , T5:  $R_{wp} = 7.81\%$  and  $GOF = 1.07$ , T6:  $R_{wp} = 8.04\%$  and  $GOF = 1.09$ . GSAS-II

was employed to perform refinement.

**Table S1** Impedance parameters of the T1-T6 electrodes

| Sample | $R_s/\Omega$ | $R_{ct}/\Omega$ | $W_o/\Omega$ | $D_{Li^+}/cm^2 s^{-1/2}$ |
|--------|--------------|-----------------|--------------|--------------------------|
| T1     | 3.12         | 216.50          | 169.70       | $2.15 \times 10^{-13}$   |
| T2     | 3.33         | 169.50          | 105.80       | $7.05 \times 10^{-12}$   |
| T3     | 4.20         | 121.60          | 83.60        | $1.39 \times 10^{-11}$   |
| T4     | 3.43         | 185.90          | 128.30       | $3.11 \times 10^{-12}$   |
| T5     | 3.10         | 221.40          | 233.50       | $8.77 \times 10^{-12}$   |
| T6     | 2.60         | 233.90          | 240.60       | $2.88 \times 10^{-12}$   |

$R_s$ : solution impedance,  $R_{ct}$ : charge transfer impedance,  $W_s$ : Warburg impedance, CPE: constant phase angle element.
